# Supplementary material for: Associations between Maternal Selenium Status and Cord Serum Vitamin D Levels: A Birth Cohort Study in Wuhan, China
Source: MDPI journal article supplement (doi:10.3390/nu14091715), 2022-04-20
Supplement: s1 [file s1]

---

## Supplementary Material

# Associations between Maternal Selenium Status and Cord Serum Vitamin D Levels: A Birth Cohort Study in Wuhan, China

Huiqing Gang <sup>1</sup>, Hongling Zhang <sup>2</sup>, Tongzhang Zheng <sup>3</sup>, Wei Xia <sup>1</sup>, Shunqing Xu <sup>1</sup>, Yuanyuan Li <sup>1,\*</sup>

## Table of Contents

**Table S1** Intraclass correlation coefficients (ICC) of SG-adjusted urinary Se, V, Co, and Tl concentrations in different trimesters.

**Table S2.** The distributions of metals (V, Co, Tl) concentrations during pregnancy.

**Table S3.** Sensitive analysis.

**Table S1** Intraclass correlation coefficients (ICC) of SG-adjusted urinary Se, V, Co, and Tl concentrations in different trimesters.

| SG-adjusted urinary metals | ICC  | 95%CI       |
|----------------------------|------|-------------|
| Selenium                   | 0.48 | (0.44,0.52) |
| Vanadium                   | 0.40 | (0.36,0.45) |
| Cobalt                     | 0.24 | (0.20,0.29) |
| Thallium                   | 0.41 | (0.37,0.45) |

**Table S2. The distributions of metals (V, Co, Tl) concentrations during pregnancy.**

| Urinary Metals( $\mu$ gg/L)  | <i>n</i> | Percentiles |      |      |      |      |
|------------------------------|----------|-------------|------|------|------|------|
|                              |          | 5th         | 25th | 50th | 75th | 95th |
| V                            |          |             |      |      |      |      |
| first trimester              | 1539     | 0.26        | 0.67 | 1.05 | 1.47 | 2.45 |
| second trimester             | 979      | 0.28        | 0.55 | 0.88 | 1.23 | 1.83 |
| third trimester              | 924      | 0.28        | 0.56 | 0.86 | 1.20 | 2.20 |
| Whole pregnancy <sup>a</sup> | 570      | 0.36        | 0.72 | 0.93 | 1.17 | 1.74 |
| Co                           |          |             |      |      |      |      |
| first trimester              | 1539     | 0.07        | 0.18 | 0.29 | 0.46 | 1.02 |
| second trimester             | 979      | 0.11        | 0.24 | 0.41 | 0.71 | 1.75 |
| third trimester              | 924      | 0.16        | 0.36 | 0.65 | 1.18 | 2.72 |
| Whole pregnancy <sup>a</sup> | 570      | 0.20        | 0.32 | 0.45 | 0.69 | 1.15 |
| Tl                           |          |             |      |      |      |      |
| first trimester              | 1539     | 0.08        | 0.23 | 0.38 | 0.60 | 1.20 |
| second trimester             | 979      | 0.08        | 0.19 | 0.32 | 0.48 | 0.88 |
| thirs trimester              | 924      | 0.07        | 0.17 | 0.28 | 0.44 | 0.93 |
| Whole pregnancy <sup>a</sup> | 570      | 0.14        | 0.24 | 0.33 | 0.45 | 0.64 |

V—Vanadium; Co—Cobalt; Tl—Thallium. <sup>a</sup> Average SG-adjusted concentrations across different trimesters.

**Table S3. Sensitive analysis. \***

| Exposure                      | Model 1             | <i>p</i> -Value | Model 2             | <i>p</i> -Value |
|-------------------------------|---------------------|-----------------|---------------------|-----------------|
|                               | % $\Delta$ (95%CI)  |                 | % $\Delta$ (95%CI)  |                 |
| first trimester <sup>a</sup>  | 0.84 (-3.14, 4.98)  | 0.6839          | 9.18 (4.37, 14.20)  | 0.0001          |
| second trimester <sup>a</sup> | 8.31 (2.07, 14.93)  | 0.0084          | 14.54 (7.80, 21.72) | <0.0001         |
| third trimester <sup>a</sup>  | 3.53 (-1.81, 9.17)  | 0.1996          | 12.40 (6.24, 18.92) | <0.0001         |
| Whole pregnancy <sup>b</sup>  | 14.38 (2.12, 28.11) | 0.0203          | 19.24 (6.02, 34.11) | 0.0033          |

CI—confidence interval. \* The mothers with GDM, PIH, and anemia among our participants were excluded. <sup>a</sup> Generalized estimating equation model, model 1 adjusted for maternal age, prepregnancy BMI, the season of birth, mode of delivery, gestational weight gain, passive smoking before/during pregnancy, and multivitamin supplement use during pregnancy. Model 2 adjusted for covariates in model 1 and SG-adjusted metals levels (Vanadium, Cobalt, Thallium). <sup>b</sup> Generalized linear model, model 2 adjusted for covariates in model 1 and SG-adjusted average concentrations of each metal (V, Co, Tl) across different trimesters.
